# Supplementary material for: Mechanistic Target of Rapamycin (Mtor) Is Essential for Murine Embryonic Heart Development and Growth
Source: PubMed Central journal article supplement (PMC3544830; doi:10.1371/journal.pone.0054221), 2013-01-14

**Rxra mRNA**

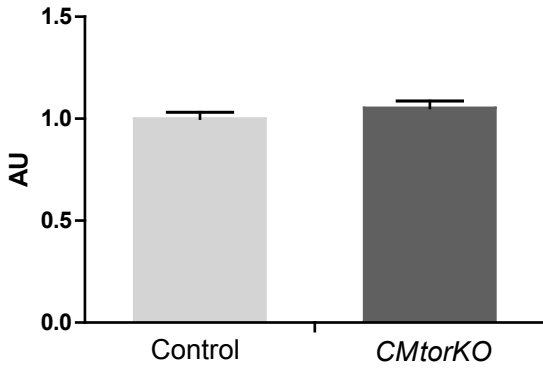

**Mycn mRNA**

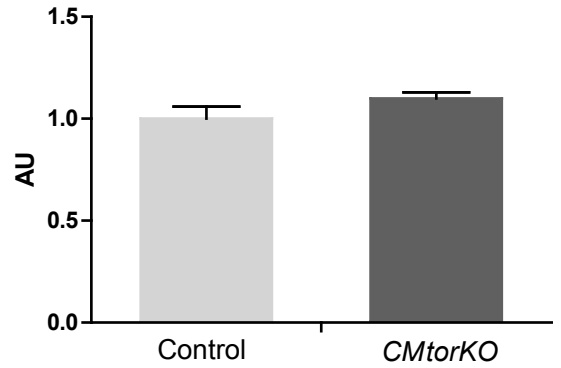

**Tef-1 mRNA**

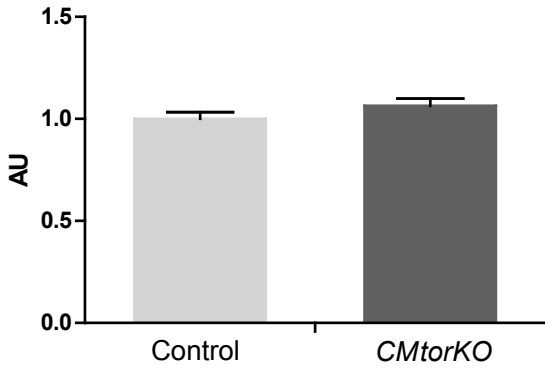

**Tbx5 mRNA**

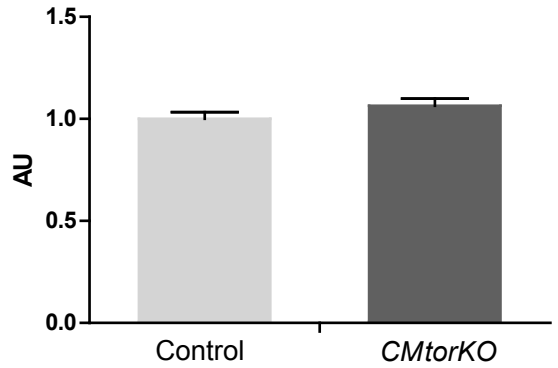

Supplement: pone.0054221.s003.pdf [file pone.0054221.s003.pdf]
