# Supplementary material for: Mechanistic Target of Rapamycin (Mtor) Is Essential for Murine Embryonic Heart Development and Growth
Source: PubMed Central journal article supplement (PMC3544830; doi:10.1371/journal.pone.0054221), 2013-01-14

Body Weight

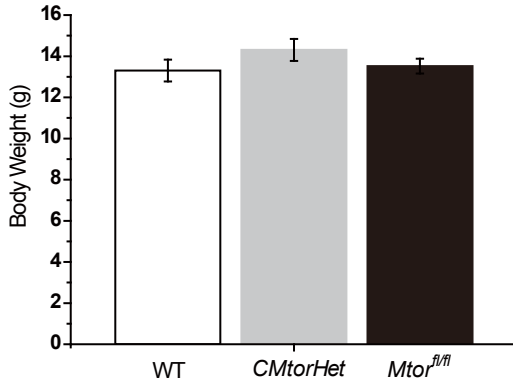

Heart Weight/Body Weight

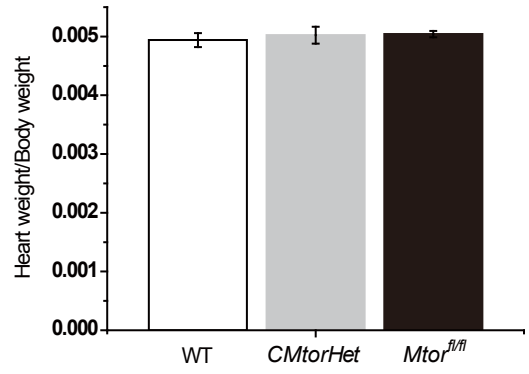

Supplement: pone.0054221.s004.pdf [file pone.0054221.s004.pdf]
